# Supplementary material for: Aids to management of headache disorders in primary care (2nd edition)
Source: Springer Nature journal article supplement (doi:10.1186/s10194-018-0899-2), 2019-05-21
Supplement: MOESM1 [file 16738766]

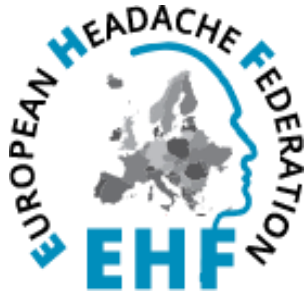

in collaboration  
with

## *Lifting The Burden*

### European principles of management of headache disorders in primary care (2<sup>nd</sup> edition)

## 1. Headache as a presenting complaint

Most people have occasional headache. This is a **symptom**, which many people regard as “normal”. Headache becomes a problem at some time in the lives of about 40% of adults and lesser but still substantial proportions of children and adolescents. These people have a **headache disorder**.

**Table 1. The headache disorders of particular importance in primary care**

|                                    |                                                                                                                                                                                                                                                                                                                                                   |
|------------------------------------|---------------------------------------------------------------------------------------------------------------------------------------------------------------------------------------------------------------------------------------------------------------------------------------------------------------------------------------------------|
| <b>Migraine</b>                    | <ul style="list-style-type: none"> <li>usually episodic, occurring in 15-25% of the general population, in women more than men in a ratio of up to 3:1;</li> <li>a chronic type is recognised, with headache occurring on more days than not</li> </ul>                                                                                           |
| <b>Tension-type headache</b>       | <ul style="list-style-type: none"> <li>usually episodic, affecting most people from time to time but, in at least 10%, recurring frequently;</li> <li>in up to 3% of adults and some children it is chronic, occurring on more days than not</li> </ul>                                                                                           |
| <b>Cluster headache</b>            | <ul style="list-style-type: none"> <li>extremely intense and frequently recurring but short-lasting headache attacks, affecting up to 3 in 1,000 men and up to 1 in 2,000 women</li> </ul>                                                                                                                                                        |
| <b>Medication-overuse headache</b> | <ul style="list-style-type: none"> <li>a secondary headache, but occurring only as a complication of a pre-existing headache disorder, usually migraine or tension-type headache, present on most days (<math>\geq 15</math> days/month) and affecting 1-2% of adults, women more than men, and about 0.5% of children and adolescents</li> </ul> |

The International Classification of Headache Disorders (ICHD) [4] (available in abbreviated form as [Supplementary materials #15](#)) recognises over 200 headache disorders, and divides them into three groups.

- **Primary headache disorders** include migraine, tension-type headache (TTH) and cluster headache, all of which are important in primary care (Table 1).
- **Secondary headache disorders** have another causative disorder underlying them; therefore the headache occurs in close temporal relation to the other disorder, and/or worsens or improves in parallel with worsening or improvement of that disorder. These associations are keys to their diagnosis. Secondary headache disorders include medication-overuse headache (MOH), also important in primary care (Table 1).

- **Painful cranial neuropathies and other facial pains** include two disorders, trigeminal neuralgia and persistent idiopathic facial pain, that need to be recognised in primary care.

A patient may have **more than one of these disorders** concomitantly.

## Which headaches should be managed where?

Four headache disorders are of particular importance in primary care (Table 1). All have a neurobiological basis. They are variably painful and disabling, but all may cause lost productivity and impair quality of life. Collectively they are the second highest cause of disability worldwide [5], and therefore very costly.

- **Migraine, TTH and MOH** can and should, almost always, be managed well in primary care.
  - Specific advice on each of these is given in [Supplementary materials #6](#), [Supplementary materials #10](#) and [Supplementary materials #12](#).
- The exception is **chronic migraine**. This uncommon type should be recognised in primary care, but it is difficult to treat and likely to require specialist management.
  - Specific advice on this is in [Supplementary materials #9](#).
- **Cluster headache** should be diagnosed in primary care because it is easily recognisable, but referred for specialist management.
  - Specific advice on this is in [Supplementary materials #11](#).
- Among painful cranial neuropathies and other facial pains are **trigeminal neuralgia** and **persistent idiopathic facial pain**. These should be recognised when present but require specialist management.
  - Specific advice on each of these is in [Supplementary materials #13](#).
- Any headache **not responding satisfactorily** to management in primary care should also be referred for specialist management.
- Of the large number of other secondary headache disorders, **some are serious**. Overall these account for <1% of patients presenting with headache, but they **must be recognised**.
  - Advice on these is provided in [Supplementary materials #3](#).

More general advice on indications for referral to specialist management is set out in [Supplementary materials #14](#).
