# Supplementary material for: Aids to management of headache disorders in primary care (2nd edition)
Source: Springer Nature journal article supplement (doi:10.1186/s10194-018-0899-2), 2019-05-21
Supplement: MOESM3 [file 16738766]

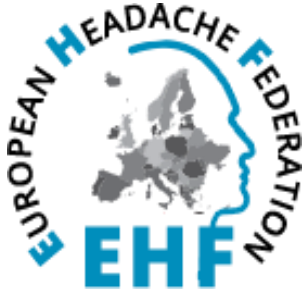

in collaboration  
with

## *Lifting The Burden*

### European principles of management of headache disorders in primary care (2<sup>nd</sup> edition)

## 3. Diagnosis of headache disorders

The universally accepted basis for the diagnosis of any headache is the International Classification of Headache Disorders, an abbreviated version of which is available as [Supplementary materials #15](#). In all health-care settings, diagnostic practice should employ ICHD terminology<sup>1</sup>.

### Differential diagnosis of the headache disorders relevant to primary care

Diagnosis of episodic migraine or episodic tension-type headache requires multiple attacks; neither diagnosis should be made after a first attack without exclusion of other disorders.

- Each of the primary headaches is in the differential diagnosis of each of the others.
- Medication-overuse headache is in the differential diagnosis of chronic migraine or chronic tension-type headache.
- The distinguishing features of these are described in [Supplementary materials #2](#).
- Otherwise, the differential diagnosis potentially includes **a small number of serious secondary headaches that are important to recognise** (see *Warning features in the history or on examination*, below).

### Taking a diagnostic history

The **history is all-important** in the diagnosis of the primary headache disorders and of medication-overuse headache. There are no useful diagnostic tests.

Table 1 indicates diagnostic questions to elicit any that may be present of the distinguishing features (see [Supplementary materials #2](#)).

---

<sup>1</sup> ICHD terminology aligns with that of the International Classification of Diseases (ICD).

**Table 1. Diagnostic questions to ask in the history**

|                                                                                                        |                                                                                                                                                                                                                                                                                            |
|--------------------------------------------------------------------------------------------------------|--------------------------------------------------------------------------------------------------------------------------------------------------------------------------------------------------------------------------------------------------------------------------------------------|
| <b>How many different headache types does the patient have?</b> A separate history is needed for each. |                                                                                                                                                                                                                                                                                            |
| <b>Time questions</b>                                                                                  | <ul style="list-style-type: none"> <li>• Why consulting now?</li> <li>• How recent in onset?</li> <li>• How frequent, and what temporal pattern (episodic or daily and/or unremitting)?</li> <li>• How long do headache episodes last?</li> </ul>                                          |
| <b>Character questions</b>                                                                             | <ul style="list-style-type: none"> <li>• Manner and speed of headache onset (abrupt, progressive over minutes, hours, days or longer)?</li> <li>• Intensity of pain?</li> <li>• Nature and quality of pain?</li> <li>• Site and spread of pain?</li> <li>• Associated symptoms?</li> </ul> |
| <b>Cause questions</b>                                                                                 | <ul style="list-style-type: none"> <li>• Predisposing and/or trigger factors?</li> <li>• Aggravating and/or relieving factors?</li> <li>• Family history of similar headache?</li> </ul>                                                                                                   |
| <b>Response questions</b>                                                                              | <ul style="list-style-type: none"> <li>• What does the patient do during the headache?</li> <li>• How much is activity limited or prevented?</li> <li>• What medications are used, and how frequently?</li> </ul>                                                                          |
| <b>State of health between attacks</b>                                                                 | <ul style="list-style-type: none"> <li>• Completely well, or residual symptoms?</li> </ul>                                                                                                                                                                                                 |

### Diagnostic diary

A diary kept over a few weeks can be a very helpful diagnostic aid, clarifying the pattern and frequency of headaches and associated symptoms as well as medication use or overuse. An example is available as [Supplementary materials #16](#).

### Warning features in the history

The history should also elicit any warning features of a serious secondary headache disorder:

- **any new headache**, or a significant change in headache characteristics, should provoke a new diagnostic enquiry;
- **very frequent headache** should always lead to detailed enquiry into medication use, since overuse is a likely cause;
- in addition, there are a number of **specific warning features** (“red flags”) that may be elicited (Table 2).

**Table 2. Specific warning features (“red flags”) in the history**

| <b>Warning feature</b>                                                                                                                    | <b>What to beware of</b>                  |
|-------------------------------------------------------------------------------------------------------------------------------------------|-------------------------------------------|
| Thunderclap headache (intense headache with “explosive” or abrupt onset)                                                                  | Subarachnoid haemorrhage                  |
| Headache with atypical aura (duration >1 hour, or including motor weakness)                                                               | TIA or stroke                             |
| Aura without headache in the absence of a prior history of migraine with aura                                                             |                                           |
| Aura occurring for the first time in a patient during use of combined hormonal contraceptives                                             | Risk of stroke (requires discontinuation) |
| New headache within 3 months of head trauma                                                                                               | Subdural haematoma                        |
| Progressive headache, worsening over weeks or longer                                                                                      | Intracranial space-occupying lesion       |
| Headache aggravated by postures or manoeuvres that raise intracranial pressure                                                            |                                           |
| Headache brought on by coughing, exercise or sexual activity                                                                              |                                           |
| Mild-to-moderate progressive or recurrent headache with irritability, dizziness (light-headedness), nausea and/or tiredness and confusion | Carbon monoxide poisoning                 |
| Headache associated with unexplained focal neurological symptoms or with epileptic seizures                                               | Suggests secondary headache               |
| Headache associated with change in memory or personality                                                                                  |                                           |
| Headache associated with weight-loss                                                                                                      |                                           |
| New headache in a patient older than 50 years                                                                                             | Temporal arteritis or intracranial tumour |
| New headache in a patient with a history of cancer or immunodeficiency (including HIV infection)                                          | Likely to be secondary headache           |
| New headache in a patient with a history of polymyalgia rheumatica                                                                        | Temporal (giant cell) arteritis           |
| New headache in a patient with a family history of glaucoma                                                                               | Glaucoma                                  |

## Physical examination of headache patients

Migraine, tension-type headache, cluster headache and medication-overuse headache are diagnosed **solely on history**. Signs are present in cluster headache patients when seen during attacks (red and/or watering eye, running or blocked nostril and/or ptosis ipsilateral to the pain).

- **Blood pressure** measurement in all cases is good practice.
- Physical examination is **mandatory** when the **history is suggestive of secondary headache**, and then may elicit warning signs (Table 3).

**Table 3. Warning features on examination, when associated with headache**

| <b>Warning feature</b>                | <b>What to beware of</b>               |
|---------------------------------------|----------------------------------------|
| Otherwise unexplained pyrexia         | Meningitis                             |
| Neck stiffness                        | Meningitis or subarachnoid haemorrhage |
| Focal neurological signs              | Secondary headache                     |
| Disorders of consciousness or memory  |                                        |
| Change in personality                 |                                        |
| Weight-loss or poor general condition |                                        |

### Investigation of headache patients

- Routine blood tests as a screen for general health may be worthwhile in primary care.
- **Special investigations**, including neuroimaging, are **not indicated unless** the history or examination suggests headache may be secondary to another condition.

### Diagnostic caveats

The following tend to be **greatly overdiagnosed**:

- **cervicogenic headache** (headache caused by a disorder of the cervical spine and its component bony, disc and/or soft tissue elements, usually but not invariably accompanied by neck pain);
- headache attributed to **arterial hypertension** (chronic arterial hypertension below 180/110 mm Hg does not appear to *cause* headache);
- headache attributed to **refractive error** (rare in adults, although some evidence exists for it in children);
- headache attributed to "**sinusitis**" (a misdiagnosis commonly applied to migraine);
- **trigeminal neuralgia** (recurrent unilateral brief electric shock-like pains, abrupt in onset and termination, limited to the distribution of one or more divisions of the trigeminal nerve and triggered by innocuous stimuli);
- **occipital neuralgia** (paroxysmal shooting or stabbing pain in the posterior part of the scalp, in the distributions of greater, lesser and/or third occipital nerves).
