# Supplementary material for: Aids to management of headache disorders in primary care (2nd edition)
Source: Springer Nature journal article supplement (doi:10.1186/s10194-018-0899-2), 2019-05-21
Supplement: MOESM4 [file 16738766]

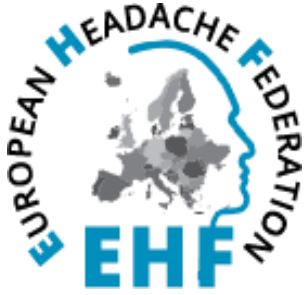

in collaboration  
with

## *Lifting The Burden*

### European principles of management of headache disorders in primary care (2<sup>nd</sup> edition)

## 4. General aspects of headache management

The purpose of these principles of management is to provide guidance, while demonstrating that headache **management in most cases is not difficult**.

The following are important for all headache disorders managed in primary care.

### Educating and reassuring patients

Many people with recurrent headache wrongly fear underlying disease, so education and **appropriate reassurance** should never be omitted.

Good treatment of patients with any headache disorder therefore begins with **explanations** of their disorder and the purpose and means of management.

- Explanation is a crucial element of **preventative management** in patients with migraine or frequent episodic tension-type headache, who are at particular risk of escalating medication consumption.
- While patients want to know the **cause** of their headache, this may not be possible. Both genetic and environmental factors contribute to processes that are not well understood.
- Patients may need to be persuaded that **tests are not helpful**.
- Patients with primary headache disorders may be advised that these tend to **remit with advancing age**.

Advice on further information that may be requested by patients is provided in [Supplementary materials #5](#).

A series of patient information leaflets provide basic explanations of migraine ([Supplementary materials #21](#)), tension-type headache ([Supplementary materials #22](#)), cluster headache ([Supplementary materials #23](#)), medication-overuse headache ([Supplementary materials #24](#)), trigeminal neuralgia ([Supplementary materials #26](#)) and persistent idiopathic facial pain ([Supplementary materials #27](#)), and their management.

## Acknowledging and assessing impact

Assessment of impact **at start of treatment** establishes need and priority for treatment and measures the baseline for later evaluation of treatment. In addition to symptom-burden, impact of recurrent headache particularly includes disability.

The **HALT-90 Index** ([Supplementary materials #18](#)), developed by *Lifting The Burden*, is an easy-to-use instrument for assessing burden in terms of **lost productive time**.

In addition, recurrent disabling headache:

- may lead to **lifestyle compromise**, either in response to attacks or in a bid to avoid them (in this way, episodic headache can have continuous impact);
- has impact not only on the person with it but also on **other people** (family, work colleagues and employer).

## Realistic aims of management

Primary headache disorders cannot be cured, but in most cases can be **effectively managed**. This means controlled by reductions in attack frequency and severity to minimise impact.

## Causes and triggers

Many patients seek help in identifying triggers, but the importance of these should not be over-emphasised.

- Correctly identified triggers offer the possibility of **avoidance** (perhaps by life-style change) as a sometimes major contribution to management.
- When triggers are relevant to individual patients, they are usually **self-evident**.
- Triggers may be less readily identified when they are **cumulative** in their effect, jointly lowering the threshold above which attacks are initiated.
- Even when they are correctly identified, triggers are **not always avoidable**.

## Follow-up

Every patient to whom treatment is offered, or whose treatment is changed, requires follow-up in order to ensure that optimum treatment has been established.

- The use of **outcome measures** is recommended to evaluate treatment and guide follow-up. The following are available:
  - the **HURT questionnaire** ([Supplementary materials #20](#)), developed by *Lifting The Burden* expressly to guide management in primary care;
  - the **HALT-30 Index** ([Supplementary materials #19](#)), to record lost productive time in the preceding month;

- a headache calendar (see below).
- **Persistent management failure** is an indication for specialist referral.

## Diaries and calendars

The principal distinction between these is in the amount of information collected. An example of each is available as [Supplementary materials #16](#) and [Supplementary materials #17](#).

**Diaries** capture more descriptive features of symptoms (headache intensity and character, associated symptoms), perhaps using free text.

- Diaries, used particularly as an aid to **diagnosis**, are useful for:
  - recording symptoms and temporal patterns that contribute to correct diagnosis;
  - recording acute medication use or overuse prior to diagnosis;
  - reporting lost productive time as part of pre-treatment assessment.

**Calendars** essentially note the temporal occurrence of headache episodes and related events such as menstruation and medication intake.

- Calendars, used in **follow-up**, are recommended in primary care for:
  - revealing associations with the menstrual cycle and possibly other triggers;
  - monitoring acute medication use or overuse during follow-up;
  - encouraging adherence to prophylactic medication;
  - recording treatment effect on headache frequency, and charting outcomes.
