# Supplementary material for: Aids to management of headache disorders in primary care (2nd edition)
Source: Springer Nature journal article supplement (doi:10.1186/s10194-018-0899-2), 2019-05-21
Supplement: MOESM9 [file 16738766]

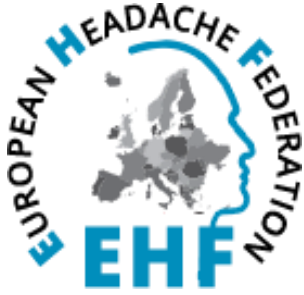

in collaboration  
with

## *Lifting The Burden*

### European principles of management of headache disorders in primary care (2<sup>nd</sup> edition)

## 9. Management of chronic migraine

Chronic migraine develops in a small minority of people with episodic migraine. It is one of the syndromes characterised by **headache on  $\geq 15$  days/month**, but is **not simply migraine that is more frequent**: it is often complicated by medication overuse, depression, anxiety and low back and/or neck pain.

**Chronic migraine** should be:

- **suspected** in any patient:
  - with a history of migraine
  - who reports (or records in a diary) **headache on  $\geq 15$  days/month**;
- **diagnosed**, in the absence of medication overuse, in patients with:
  - **headache on  $\geq 15$  days/month** over the last 3 months, which
  - on  **$\geq 8$  days/month**:
    - fulfilled the diagnostic criteria for migraine, *or*
    - responded to migraine-specific drug treatment.

The **presence of medication overuse** in such patients complicates the diagnosis:

- medication-overuse headache (MOH) is another syndrome characterised by headache on  $\geq 15$  days/month;
- chronic migraine and MOH are **not mutually exclusive** but, even when the conditions above are met, only MOH and not chronic migraine may be present when medication is being overused;
- medication overuse, whether or not occurring with chronic migraine, must **always be recognised and managed as a separate medical problem**.

Medication-overuse, and MOH, can often be successfully managed in primary care (see [Supplementary materials #9](#)), but patients with **chronic migraine** should be **referred for specialist care**.

## Principles of management

Chronic migraine is **difficult to treat**. Management in specialist care includes:

- **education** of patients about chronicity and its causes and risk factors;
- recognition and management of **medication overuse**, when present;
- management of any **comorbidities**;
- use of **preventative drugs** (Table 1);
- **follow up**, with both medical and psychological care.

## Preventative drugs

Those used in specialist care, with evidence of efficacy, are shown in Table 1.

**Table 1. Drugs used by specialists in chronic migraine prophylaxis**

|                                                                                                                                                                                                                                                                                                       |                                                                                                                                                                                                                                                                                                               |
|-------------------------------------------------------------------------------------------------------------------------------------------------------------------------------------------------------------------------------------------------------------------------------------------------------|---------------------------------------------------------------------------------------------------------------------------------------------------------------------------------------------------------------------------------------------------------------------------------------------------------------|
| Topiramate, 50 mg or more twice daily                                                                                                                                                                                                                                                                 |                                                                                                                                                                                                                                                                                                               |
| Onabotulinum toxin A, 155-195 units by multisite injection                                                                                                                                                                                                                                            | <ul style="list-style-type: none"> <li>• not licensed for chronic migraine in some countries, <i>or</i></li> <li>• not reimbursed, <i>and/or</i></li> <li>• regulators require prior failure of two or more of the drugs used in prophylaxis of episodic migraine</li> </ul>                                  |
| CGRP monoclonal antibodies (to the peptide or its receptor): <ul style="list-style-type: none"> <li>• erenumab 70 or 140 mg s/c once monthly</li> <li>• fremanezumab 225 mg s/c once monthly or 675 mg s/c once quarterly</li> <li>• galcanezumab 240 mg s/c, then 120 mg s/c once monthly</li> </ul> | <ul style="list-style-type: none"> <li>• newly licensed, not yet universally available or reimbursed, usually restricted to specialist care and reserved for those failing (or not tolerating) other prophylactics</li> <li>• all self-administered by auto-injector</li> <li>• high relative cost</li> </ul> |
