# Supplementary material for: Aids to management of headache disorders in primary care (2nd edition)
Source: Springer Nature journal article supplement (doi:10.1186/s10194-018-0899-2), 2019-05-21
Supplement: MOESM11 [file 16738766]

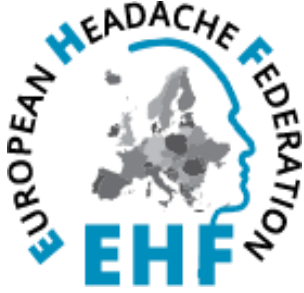

in collaboration  
with

## *Lifting The Burden*

### European principles of management of headache disorders in primary care (2<sup>nd</sup> edition)

## 11. Management of cluster headache

Cluster headache, a type of trigeminal autonomic cephalalgia, is characterised by frequently recurring, localised, short-lasting but **extremely severe headache**, which is accompanied by a set of highly characteristic **autonomic symptoms**.

- Cluster headache is **easily recognisable** (see [Supplementary materials #2](#)).
- It should **never be missed**.

It has **two subtypes**:

- **episodic cluster headache**, with attacks occurring in bouts (clusters) that last for a few or many weeks and then remit for  $\geq 3$  months;
- **chronic cluster headache**, less common, but persisting without remissions, or with remissions of  $< 3$  months.

### General principles

- Patients with this disorder **suffer very badly** if ineffectively treated:
  - cluster headache management is, at least initially, **better left to specialists** who see this disorder frequently;
  - on first presentation it demands **accelerated referral** for investigation and treatment;
  - **recognition** in primary care is crucial to ensure prompt referral.
- The **objective** of management in both episodic and chronic subtypes is **total attack suppression**. This is not always achievable.
- Both acute medication and prophylaxis have a role in management, but **preventative drugs are the mainstay of treatment** in most cases.
- Once effective treatment has been established, future clusters, or maintenance therapy in the case of chronic cluster headache, may be managed in primary care.

## Acute therapies

There are limited options (Table 1), but efficacy may be high.

- Availability varies between countries.
- Most are not specifically licensed for cluster headache. Use of drugs off-licence rests on individual clinical responsibility.

**Table 1. Acute therapies used in cluster headache by specialists**

|                                                                                                                                                                                    |                                                                                                                                                                                                                                                                                                                                               |
|------------------------------------------------------------------------------------------------------------------------------------------------------------------------------------|-----------------------------------------------------------------------------------------------------------------------------------------------------------------------------------------------------------------------------------------------------------------------------------------------------------------------------------------------|
| <p><b>Triptans:</b></p> <ul style="list-style-type: none"> <li>• sumatriptan 6 mg s/c</li> <li>• zolmitriptan 5 mg nasal spray</li> <li>• sumatriptan 20 mg nasal spray</li> </ul> | <p>none can be recommended for use more than twice a day</p> <ul style="list-style-type: none"> <li>• the most highly-effective acute treatment</li> <li>• less-certain efficacy but an alternative for those unable or unwilling to use sumatriptan s/c</li> <li>• less-certain efficacy: absorption depends largely on ingestion</li> </ul> |
| <p>Oxygen 100% at <math>\geq 12</math> l/min until response, or for <math>\geq 15</math> minutes</p>                                                                               | <ul style="list-style-type: none"> <li>• requires a non-rebreathing mask and regulator;</li> <li>• helps some people and may be used as frequently as needed</li> </ul>                                                                                                                                                                       |

## Drugs to avoid

- **Oral triptans** are slow in onset of action and are not useful substitutes.
- **Analgesics**, including opioids, have little or no place in treating cluster headache.

## Preventative therapy

Specialists employ the following:

- **transition therapy** (Table 2), used at onset of treatment to achieve more rapid response during dose escalation of any of the preventative drugs;
- **maintenance prophylaxis** (Table 3), balancing efficacy of drugs against their significant toxicity (refer to pharmacopoeia).

**Table 2. Transition therapies used in cluster headache by specialists**

|                                         |                                                                                                                 |
|-----------------------------------------|-----------------------------------------------------------------------------------------------------------------|
| <p>Prednisolone 60-80 mg once daily</p> | <ul style="list-style-type: none"> <li>• for 2-4 days, discontinued by dose reduction over 1-3 weeks</li> </ul> |
| <p>Greater occipital nerve blockade</p> | <ul style="list-style-type: none"> <li>• using various agents</li> </ul>                                        |

**Table 3. Drugs used by specialists in maintenance prophylaxis of cluster headache**

|                                     |                                                                                                           |
|-------------------------------------|-----------------------------------------------------------------------------------------------------------|
| Verapamil 240-960 mg daily          | <ul style="list-style-type: none"> <li>• ECG monitoring advised</li> </ul>                                |
| Lithium carbonate 600-1600 mg daily | <ul style="list-style-type: none"> <li>• serum levels must be regularly monitored</li> </ul>              |
| Topiramate 50-100 mg twice daily    | <ul style="list-style-type: none"> <li>• less evidence of efficacy, but no monitoring required</li> </ul> |

### Principles of preventative therapy

- **Prophylaxis** of episodic cluster headache should begin **as early as possible** after the start of a new cluster bout.
- **Failure** of one drug does not predict failure of others.
- **Combinations** of drugs may be tried, but the potential for toxicity is obviously high.
- For episodic cluster headache, maintenance prophylaxis should be **discontinued** by tapering, usually 2 weeks after full remission.
- For chronic cluster headache, maintenance prophylaxis may need to be continued **long-term**.

### Other treatment options

- **Neuromodulation**, non-invasive or invasive, is occasionally used by specialists.

### Follow-up

Every patient with active cluster headache requires **frequent follow-up** both to ensure that optimum acute and preventative treatments are maintained and to **monitor for treatment toxicity**.

- Patients with episodic cluster headache in remission should be advised to **return promptly** at the onset of the next cluster episode.

### Information for patients

A patient information leaflet on cluster headache and its management, developed by *Lifting The Burden*, is available as [Supplementary materials #23](#).
