# Supplementary material for: Aids to management of headache disorders in primary care (2nd edition)
Source: Springer Nature journal article supplement (doi:10.1186/s10194-018-0899-2), 2019-05-21
Supplement: MOESM13 [file 16738766]

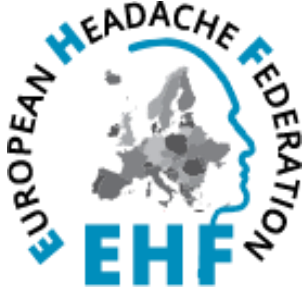

in collaboration  
with

## *Lifting The Burden*

### European principles of management of headache disorders in primary care (2<sup>nd</sup> edition)

## 13. Management of trigeminal neuralgia and persistent idiopathic facial pain

Management of these uncommon but troublesome disorders is **better left to specialists**.

- **Recognition in primary care is crucial** to ensure prompt referral.

### Trigeminal neuralgia (TN)

This disorder presents as recurrent, unilateral, **brief but severe, electric-shock-like pains** in the distribution of the trigeminal nerve, abrupt in onset and termination and often triggered by innocuous stimuli.

It is not common, affecting 1-2 in every 1,000 people. Women are twice as likely to be affected as men.

### Principles of management

- TN is **extremely painful**, and untreated is physically, psychologically and socially debilitating:
  - patients may avoid the triggers of eating and drinking, **seriously impairing food and fluid intake**.
  - TN therefore demands **accelerated specialist referral** for investigation and treatment.
- Good treatment begins with **education of patients**, explaining their disorder and the purpose and means of management.
- The **objective** in management, by medical or surgical means, is abatement of attacks and pain freedom. This is not always achievable.
- **MRI is mandatory** since classical TN and secondary TN (due usually to cerebellopontine angle tumour, AV-malformation or multiple sclerosis) may be indistinguishable by symptom presentation.
- **First-line** treatment is prophylactic (antiepileptic) medication.

- Acute therapies (opioids or other analgesics) have **no place** in management since attacks are very short-lasting.
- Severe exacerbations with anorexia and dehydration, due to pain triggered by eating or drinking, may require **hospital admission** for intravenous hydration and medication.

## Education of patients

A patient information leaflet on trigeminal neuralgia is available as [Supplementary materials #26](#).

**Key points** of information are:

- TN produces very characteristic, **very severe, electric-shock-like pains**:
  - along a nerve on one side of the face, usually in the **cheek or jaw**;
  - repetitively, in short-lasting bouts (up to 2 minutes), which:
    - occur **daily for weeks or months** but sometimes remit spontaneously;
    - usually **start without warning**, but can be **provoked** by light touch, wind, cold air, eating, drinking, brushing the teeth or speaking.
- The **cause** of TN is often not known:
  - some people have a blood vessel in close contact with and compressing the affected nerve: an **MRI brain scan** is required to show this;
  - however, there are other unknown causes.
- **Specialist referral** is therefore necessary.
- There are a **number of treatments** for TN, which often work well:
  - these are **preventative** medications, to be taken daily;
  - **painkillers do not help**;
  - occasionally, surgery is required, but as a last resort;
  - TN does **not require dental treatment**.

**Table 1. Drugs used by specialists in trigeminal neuralgia prophylaxis**

|                                                                                                                                                                                                                                                                                |                                                                                                                                                                                                                                                                                                               |
|--------------------------------------------------------------------------------------------------------------------------------------------------------------------------------------------------------------------------------------------------------------------------------|---------------------------------------------------------------------------------------------------------------------------------------------------------------------------------------------------------------------------------------------------------------------------------------------------------------|
| <p><b>First line:</b></p> <ul style="list-style-type: none"> <li>• carbamazepine 200-2400 mg daily</li> <li>• oxcarbazepine 600-2400 mg daily</li> </ul>                                                                                                                       | <p>these drugs:</p> <ul style="list-style-type: none"> <li>• reduce efficacy of oral contraceptives;</li> <li>• may induce hyponatraemia (especially oxcarbazepine): regular monitoring is advised;</li> <li>• may induce osteoporosis in long-term treatment: prophylaxis against this is advised</li> </ul> |
| <p><b>Second-line</b> (either as monotherapy or as add-on medication):</p> <ul style="list-style-type: none"> <li>• gabapentin 600-3600 mg daily</li> <li>• pregabalin 150-600 mg daily</li> <li>• lamotrigine 200-1000 mg daily (very slow up-titration necessary)</li> </ul> |                                                                                                                                                                                                                                                                                                               |

## Preventative medications

A narrow range of antiepileptic drugs are effective, and used by specialists (Table 1). **Maximum dosages** may be necessary to achieve pain relief, and balancing efficacy against toxicity is difficult.

## Principles of drug prophylaxis

- Dosages should be **up-titrated slowly** until pain relief is achieved or side effects become unacceptable.
- Patients established on medication may be taught to **titrate up and down**, according to symptom severity.
- **Combinations** may cause fewer side-effects because lower doses may be required of each drug.
- Treatment may be **slowly tapered** after complete freedom from pain, and discontinued in the absence of relapse.

## Other treatment options in medically refractory patients

- **Neurosurgical treatments** are relevant when medical treatment with maximum tolerated doses achieve insufficient efficacy, but:
  - microvascular decompression (appropriate when neurovascular compression, not merely contact, has been demonstrated) carries a small risk of severe complications such as cranial nerve palsy or stroke;
  - gamma-knife and/or percutaneous procedures (balloon compression, glycerol injection, thermocoagulation or pulsed radiofrequency treatment) targeting the trigeminal ganglion are less invasive but probably less efficacious.

## Follow-up

While every patient with TN requires specialist initial management, long-term follow-up once stable is appropriate in primary care.

- Patients should be educated on:
  - how to **taper medication** cautiously once pain freedom is achieved;
  - how to **reintroduce medication** by careful up-titration if/when pain returns.

## Persistent idiopathic facial pain (PIFP)

Previously termed "atypical facial pain", this disorder presents as dull, aching or nagging, **poorly localized facial and/or oral pain**, which recurs daily for >2 hours over >3 months. Only rarely are there electric-shock-like pain attacks as in trigeminal neuralgia.

PIFP is rare, mostly affecting younger women, but it can start at any age.

## Principles of management

- PIFP is painful, and can be physically, psychologically and socially **debilitating**.
- It is often difficult to manage, often has comorbidities, and usually requires **specialist referral** in the first instance.
- Good treatment begins with **education of patients**, explaining their disorder and the purpose and means of management.
- Freedom from pain is difficult to achieve: the **objectives** in management, by medical, physical and/or psychological therapies, are reduction of pain intensity and developing patients' coping mechanisms.
- Treatment is **prophylactic**: acute therapies (opioids or other analgesics) have no place in management of PIFP.

## Education of patients

A patient information leaflet on persistent idiopathic facial pain is available as [Supplementary materials #27](#).

**Key points** of information are:

- PIFP is most often a **constant, dull, nagging or aching pain** in the cheek and lower jaw. Rarely there are electric-shock-like pains also.
- There are **no specific triggers**.
- The **causes** are unknown.
- There are **no tests** to confirm the diagnosis.
- **Preventative medications**, taken every day, are the best treatments for most people with PIFP:
  - these medications are more commonly used as antidepressants, but are very useful against chronic pain disorders even in people who are not depressed;
  - **painkillers are unhelpful** and, if taken too often, are likely to make things worse.

**Table 2. Drugs used in prophylaxis of persistent idiopathic facial pain**

|                                                                                                                                                                                                    |                                                                                                                                                                                                                                                               |
|----------------------------------------------------------------------------------------------------------------------------------------------------------------------------------------------------|---------------------------------------------------------------------------------------------------------------------------------------------------------------------------------------------------------------------------------------------------------------|
| <p><b>First line:</b></p> <ul style="list-style-type: none"> <li>• amitriptyline or nortriptyline, 10-100 mg at night</li> </ul>                                                                   | <ul style="list-style-type: none"> <li>• intolerance is reduced by starting at a low dose (10 mg) and incrementing by 10-25 mg every 1-2 weeks;</li> <li>• nortriptyline has fewer anticholinergic side-effects but less good evidence of efficacy</li> </ul> |
| <p><b>Second line</b> (either as monotherapy or as add-on medication):</p> <ul style="list-style-type: none"> <li>• gabapentin 600-3600 mg daily</li> <li>• pregabalin 150-600 mg daily</li> </ul> |                                                                                                                                                                                                                                                               |

## Preventative medications

Drugs with some efficacy are shown in Table 2. **Maximum dosages** may be necessary.

- Use of drugs off-licence rests on individual clinical responsibility.

## Principles of prophylaxis

- Patients receiving medication more often used as an antidepressant should be **advised of this, and why**; otherwise, they may default on finding out.
- Dosages should be **up-titrated slowly** until pain relief is achieved or side effects become unacceptable.
- **Combinations** may cause fewer side-effects because lower doses may be required of each drug.

## Follow-up

While every patient with PIFP requires specialist initial management, long-term follow-up once stable is appropriate in primary care.
