# Supplementary material for: Aids to management of headache disorders in primary care (2nd edition)
Source: Springer Nature journal article supplement (doi:10.1186/s10194-018-0899-2), 2019-05-21
Supplement: MOESM16 [file 16738766]

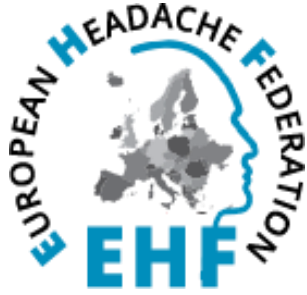

in collaboration  
with

## *Lifting The Burden*

### **Aids to management of headache disorders in primary care (2nd edition)**

## **16. Headache diary to aid diagnosis in primary care**

### **Instructions**

Filling in this diary on a daily basis will help ensure that your headache is diagnosed correctly and its effects are fully assessed. This will improve your treatment. Please complete it **at the end of each day** of the week as a summary of the headache(s) you had that day.

Insert your full name (first and family names) and the date when you started to keep the diary. The diary lasts for 1 week.

### **Notes:**

Row 1: insert the date of each day of the week.

Row 2: circle the appropriate answer (if you circle "no", the diary is completed for today).

Row 3: enter the time your headache started today in hours and minutes (if it began yesterday and was still there today, draw a left arrow ←→).

Row 4: enter the time the headache went away (if it is still there when you go to bed for the night, draw a right arrow →→ and continue your recording tomorrow).

Row 5: circle the appropriate answer (if the pain started on one side and spread or shifted to the other, circle the side on which it began and also "both").

Row 6: there are many ways of describing headache, and the choices here may not match yours perfectly, but tick the box for the one that fits better ("pulsating/throbbing" means the pain worsens with each heart beat; "pressing/tightening" means it is like a tight band or vice around the head).

Row 7: circle the most appropriate answer, thinking about your headache today overall (not at its very worst).

Row 8: circle "no" if your headache prevented you from doing anything today that you had planned to do.

Row 9: if you answered "no" to the previous question, please estimate how much you actually did today of what you had planned to do (tick the appropriate box).

Row 10: circle the appropriate answer (the question refers to simple exercise such as walking or going upstairs, not hard physical exercise).

Row 11: circle the most appropriate answer (nausea means feeling you are going to be sick).

Row 12: circle the appropriate answer.

Row 13: circle the most appropriate answer (this question refers to ordinary light rather than very bright sunlight; if you tried to avoid the light and preferred a dark room, you should answer either "a little" or "a lot").

Row 14: circle the most appropriate answer (this question refers to ordinary noise levels rather than very loud noises; if you tried to avoid noise and preferred a quiet room, you should answer either "a little" or "a lot").

Row 15: write here anything that you believe may have caused your headache.

Row 16: Write the name(s) and strength(s) (eg, 6 mg, 500 mg), of anything you took today for your headache, and the number of pills, tablets, suppositories or injections.



|                                                                                                             |                                                    |                                                                                  |                                                                                  |                                                                                  |                                                                                  |                                                                                  |                                                                                  |                                                                                  |
|-------------------------------------------------------------------------------------------------------------|----------------------------------------------------|----------------------------------------------------------------------------------|----------------------------------------------------------------------------------|----------------------------------------------------------------------------------|----------------------------------------------------------------------------------|----------------------------------------------------------------------------------|----------------------------------------------------------------------------------|----------------------------------------------------------------------------------|
| 6. Which of these better describes the pain?<br>(tick one box)                                              | pulsating/throbbing<br>pressing/tightening         | <input type="checkbox"/><br><input type="checkbox"/>                             | <input type="checkbox"/><br><input type="checkbox"/>                             | <input type="checkbox"/><br><input type="checkbox"/>                             | <input type="checkbox"/><br><input type="checkbox"/>                             | <input type="checkbox"/><br><input type="checkbox"/>                             | <input type="checkbox"/><br><input type="checkbox"/>                             | <input type="checkbox"/><br><input type="checkbox"/>                             |
| 7. How bad has the headache been today?<br>(circle one)                                                     | not bad<br>quite bad<br>very bad                   | not bad<br>quite bad<br>very bad                                                 | not bad<br>quite bad<br>very bad                                                 | not bad<br>quite bad<br>very bad                                                 | not bad<br>quite bad<br>very bad                                                 | not bad<br>quite bad<br>very bad                                                 | not bad<br>quite bad<br>very bad                                                 |                                                                                  |
| 8. Were you able to do everything you planned to do today?<br>(circle one)<br>(if "yes", go to question 10) | yes / no                                           | yes / no                                                                         | yes / no                                                                         | yes / no                                                                         | yes / no                                                                         | yes / no                                                                         | yes / no                                                                         |                                                                                  |
| 9. If no, about how much did you get done?<br>(tick one box)                                                | more than half<br>less than half<br>nothing at all | <input type="checkbox"/><br><input type="checkbox"/><br><input type="checkbox"/> | <input type="checkbox"/><br><input type="checkbox"/><br><input type="checkbox"/> | <input type="checkbox"/><br><input type="checkbox"/><br><input type="checkbox"/> | <input type="checkbox"/><br><input type="checkbox"/><br><input type="checkbox"/> | <input type="checkbox"/><br><input type="checkbox"/><br><input type="checkbox"/> | <input type="checkbox"/><br><input type="checkbox"/><br><input type="checkbox"/> | <input type="checkbox"/><br><input type="checkbox"/><br><input type="checkbox"/> |
| 10. Was your headache made worse by simple exercise, such as going upstairs?<br>(circle one)                | yes / no                                           | yes / no                                                                         | yes / no                                                                         | yes / no                                                                         | yes / no                                                                         | yes / no                                                                         | yes / no                                                                         |                                                                                  |
| 11. Have you felt sick (nauseated) today with the headache?<br>(circle one)                                 | no<br>a little<br>a lot                            | no<br>a little<br>a lot                                                          | no<br>a little<br>a lot                                                          | no<br>a little<br>a lot                                                          | no<br>a little<br>a lot                                                          | no<br>a little<br>a lot                                                          | no<br>a little<br>a lot                                                          |                                                                                  |
| 12. Have you been sick (vomited) today?<br>(circle one)                                                     | yes / no                                           | yes / no                                                                         | yes / no                                                                         | yes / no                                                                         | yes / no                                                                         | yes / no                                                                         | yes / no                                                                         |                                                                                  |
| 13. Has the light bothered you, or made the headache worse today?<br>(circle one)                           | no<br>a little<br>a lot                            | no<br>a little<br>a lot                                                          | no<br>a little<br>a lot                                                          | no<br>a little<br>a lot                                                          | no<br>a little<br>a lot                                                          | no<br>a little<br>a lot                                                          | no<br>a little<br>a lot                                                          |                                                                                  |

|                                                                                                                     |                         |                         |                         |                         |                         |                         |                         |
|---------------------------------------------------------------------------------------------------------------------|-------------------------|-------------------------|-------------------------|-------------------------|-------------------------|-------------------------|-------------------------|
| 14. Has noise bothered you, or made the headache worse today?<br>(circle one)                                       | no<br>a little<br>a lot | no<br>a little<br>a lot | no<br>a little<br>a lot | no<br>a little<br>a lot | no<br>a little<br>a lot | no<br>a little<br>a lot | no<br>a little<br>a lot |
| 15. Did anything trigger the headache?<br>(if so, please write in what it was)                                      |                         |                         |                         |                         |                         |                         |                         |
| 16. Did you take anything today for the headache<br>(pills, tablets, suppositories, injections or other medicines)? | Name and strength       |                         |                         |                         |                         |                         |                         |
|                                                                                                                     | How many?               |                         |                         |                         |                         |                         |                         |
|                                                                                                                     | Name and strength       |                         |                         |                         |                         |                         |                         |
|                                                                                                                     | How many?               |                         |                         |                         |                         |                         |                         |
|                                                                                                                     | Name and strength       |                         |                         |                         |                         |                         |                         |
|                                                                                                                     | How many?               |                         |                         |                         |                         |                         |                         |
|                                                                                                                     | Name and strength       |                         |                         |                         |                         |                         |                         |
|                                                                                                                     | How many?               |                         |                         |                         |                         |                         |                         |
|                                                                                                                     | Name and strength       |                         |                         |                         |                         |                         |                         |
|                                                                                                                     | How many?               |                         |                         |                         |                         |                         |                         |
