# Supplementary material for: Aids to management of headache disorders in primary care (2nd edition)
Source: Springer Nature journal article supplement (doi:10.1186/s10194-018-0899-2), 2019-05-21
Supplement: MOESM18 [file 16738766]

# Lifting The Burden

in official relations with  
the World Health Organization

## The Global Campaign against Headache

### 18. HALT-90 Index\* (Headache-Attributed Lost Time – 90 days)

**You may be given this short questionnaire before you start treatment. Your answers to the five simple questions will help us understand how much your headaches are affecting your life, and guide your treatment.**

**Please answer these five questions carefully**

**1**

On how many **days** in the **last three months** could you **not go** to work or school because of your headaches?

|  |  |
|--|--|
|  |  |
|--|--|

**2**

On how many **days** in the **last three months** could you do **less than half** your usual amount in your job or schoolwork because of your headaches?

(Do not include days you counted in question 1 where you missed work or school.)

|  |  |
|--|--|
|  |  |
|--|--|

**3**

On how many **days** in the **last three months** could you **not do any** household work because of your headaches?

(Do not include days you counted in questions 1 or 2.)

|  |  |
|--|--|
|  |  |
|--|--|

**4**

On how many **days** in the **last three months** could you do **less than half** your usual amount of household work because of your headaches?

(Do not include days you counted in any of the previous questions.)

|  |  |
|--|--|
|  |  |
|--|--|

**5**

On how many **days** in the **last three months** did you **miss** family, social or leisure activities because of your headaches?

|  |  |
|--|--|
|  |  |
|--|--|

**Grading** (I-IV indicate, in order, increasing need for medical care; either III or IV indicates high need)

|              |                              |           |
|--------------|------------------------------|-----------|
| <b>0-5</b>   | Minimal or infrequent impact | Grade I   |
| <b>6-10</b>  | Mild or infrequent impact    | Grade II  |
| <b>11-20</b> | Moderate impact              | Grade III |
| <b>20+</b>   | Severe impact                | Grade IV  |

**TOTAL**

|  |  |  |
|--|--|--|
|  |  |  |
|--|--|--|

\* HALT is closely based on the first five questions of MIDAS, developed by RB Lipton and WF Stewart.
